# Supplementary material
Source: PubMed Central journal article supplement (PMC6369286)
Supplement: supp_RA118.006638_141845_2_supp_250486_pjn69x.pdf [file supp_RA118.006638_141845_2_supp_250486_pjn69x.pdf]

## **A *Burkholderia thailandensis* multidrug efflux pump with unexpected roles in antibiotic resistance**

Afsana Sabrin, Brennan W. Gioe, Ashish Gupta and Anne Grove  
Department of Biological Sciences, Louisiana State University, Baton Rouge, LA 70803

### Contents:

Table S1. Thermal stability of reduced and oxidized OstR

Table S2. Affinity of OstR variants for *emrB* promoter DNA

Table S3. Thermal stability of cysteine variants

Table S4. Primer sequences.

**Table S1. Thermal stability of reduced and oxidized OstR**

| <b>Protein: Ligand</b>                           | <b>T<sub>m</sub> (°C)</b> |
|--------------------------------------------------|---------------------------|
| <b>OstR (reduced)</b>                            | 34.1 ± 0.1                |
| <b>OstR: Bipyridyl</b>                           | 33.4 ± 0.2                |
| <b>OstR: DNA (1: 2)</b>                          | 39.3 ± 0.2                |
| <b>OstR: ZnCl<sub>2</sub> (1: 100)</b>           | 37.2 ± 0.1                |
| <b>OstR: H<sub>2</sub>O<sub>2</sub> (1: 100)</b> | 38.5 ± 0.3                |
| <b>OstR: CHP (1: 100)</b>                        | 39.9 ± 0.3                |
| <b>OstR: tBHP (1: 100)</b>                       | 41.6 ± 0.1                |

**Table S2. Affinity of OstR variants for *emrB* promoter DNA**

| Protein                             | Kd (nM)    | Hill coefficient (n <sub>H</sub> ) |
|-------------------------------------|------------|------------------------------------|
| OstR                                | 6.7 ± 0.8  | 1.9 ± 0.3                          |
| H <sub>2</sub> O <sub>2</sub> -OstR | 9.7 ± 1.1  | 1.9 ± 0.4                          |
| CuCl <sub>2</sub> -OstR             | 6.5 ± 1.0  | 1.8 ± 0.4                          |
| OstR-C3A                            | 17.5 ± 2.3 | 1.6 ± 0.3                          |
| OstR-C4A                            | 23.4 ± 3.2 | 1.2 ± 0.3                          |
| OstR-C169A                          | 539 ± 58   | 1.9 ± 0.2                          |

**Table S3. Thermal stability of cysteine variants**

| Protein    | Reduced    | Bipyridyl  | ZnCl <sub>2</sub><br>(1:100) | DNA<br>(1:2) | H <sub>2</sub> O <sub>2</sub><br>(1:100) | CuCl <sub>2</sub><br>(1:100) |
|------------|------------|------------|------------------------------|--------------|------------------------------------------|------------------------------|
| OstR-C3A   | 44.7 ± 0.1 | 41.5 ± 0.1 | 50.1 ± 0.5                   | 67.5 ± 0.6   | nt                                       | nt                           |
| OstR-C4A   | 50.6 ± 0.1 | 50.4 ± 0.2 | 51.1 ± 0.3                   | 50.2 ± 0.2   | nt                                       | nt                           |
| OstR-C169A | nt         | nt         | 56.8 ± 0.3                   | 41.2 ± 0.2   | nt                                       | nt                           |

T<sub>m</sub> ± SD (°C). nt = no transition.

**Table S4. Primer sequences**

| Cloning, mutagenesis, and amplification of <i>emrB</i> promoter DNA |                                                |
|---------------------------------------------------------------------|------------------------------------------------|
| OstR_tran_Fw                                                        | CGTTTTTCCTCATATGCACTGTTGC                      |
| OstR_tran_Rv                                                        | CGAGGGAATTCCATGCTCTTTC                         |
| I21_C3A_Fw                                                          | GCGGCAGCCATATGCACGCGTGC GGTTTCGCGCAATCGACCGGAC |
| I21_C3A_Rv                                                          | GAACCGCACGCGTGCATATGGCTGCCGCGCGGCACCAGGC       |

|                                                |                                              |
|------------------------------------------------|----------------------------------------------|
| I21_C4A_Fw                                     | GCGGCAGCCATATGCACTGTGCCGGTTCGCGCAATCGACCGGAC |
| I21_C4A_Rv                                     | GAACCGGCACAGTGCATATGGCTGCCGCGCGGCACCAGGC     |
| I21_C169A_Fw                                   | GATCCGCGAGCCGCCGCGTCGATCGCCGAGCCGCCGC        |
| I21_C169A_Rv                                   | GATCGACGCGGCGGCTGCGGAATCCGCGGGCGCCC          |
| BTH_22int_Fw                                   | GGTAAGCGCTGACCGGGA A                         |
| BTH_22int_Rv                                   | AGCCATGCGTCTCTCCT                            |
| <b>Complementation and mutant verification</b> |                                              |
| LacZ_148                                       | GGGTAACGCCAGGGTTTTCC                         |
| BTH_21_Fw                                      | CACCGGGCAAGGCGGC                             |
| Cre_del21_Fw                                   | CACCGGGCAAGGCGGC                             |
| Cre_del21_Rv                                   | GACGAAGCCCTTCTTCTCG                          |
| Tra_delE_Fw                                    | TGACAAGACACTTACTGTCGGTC                      |
| Tra_delE_Rv                                    | GAGATCACCCACGTGCCTTC                         |
| OstR_XbaI_Fw                                   | GATCTTCTAGACGCGATGCGGACCGGACA                |
| OstR_KpnI_Rv                                   | AAGCGGGTACCGTCGCAGCCA                        |
| Con_pBBR_XbaI                                  | GTAATACGACTCACTATAGGGC                       |
| Con_pBBR_KpnI                                  | GCAATTAACCCTCACTAAAGG                        |
| <b>qRT-PCR</b>                                 |                                              |
| OstrR_auto_Fw                                  | ATGCACTGTTGCGGTTTCGC                         |
| OstR_auto_Rv                                   | ATAGCCGAGGCTCGATTCGAG                        |
| EmrB_F1                                        | GGATCACCGACAACACTACACG                       |
| EmrB_R1                                        | TTGAACCAGTCACGGTCCTT                         |
| AmrB_Fw                                        | TGTCGATGAGCAAGGTCGTG                         |
| AmrB_Rv                                        | TGATCTGCTTCATCGCCTTCA C                      |
| BpeF_Fw                                        | GATCACCGTCACGTTCAAGCT                        |
| BpeF_Rv                                        | GGCGATCCTTCACGTTGATGAG                       |
| Glusyn_qPCR_Fw                                 | GCAAGAAGAGCCACGAAATC                         |
| Glusyn_qPCR_Rv                                 | CCATCTCCTCGCGATAGAAC                         |
